# Supplementary material
Source: publisher figshare collection journal article supplement (https://frontiersin.figshare.com/ndownloader/files/26192453)

Fig. S3 The Venn diagram of intestinal bacteria of houseflies in each group.

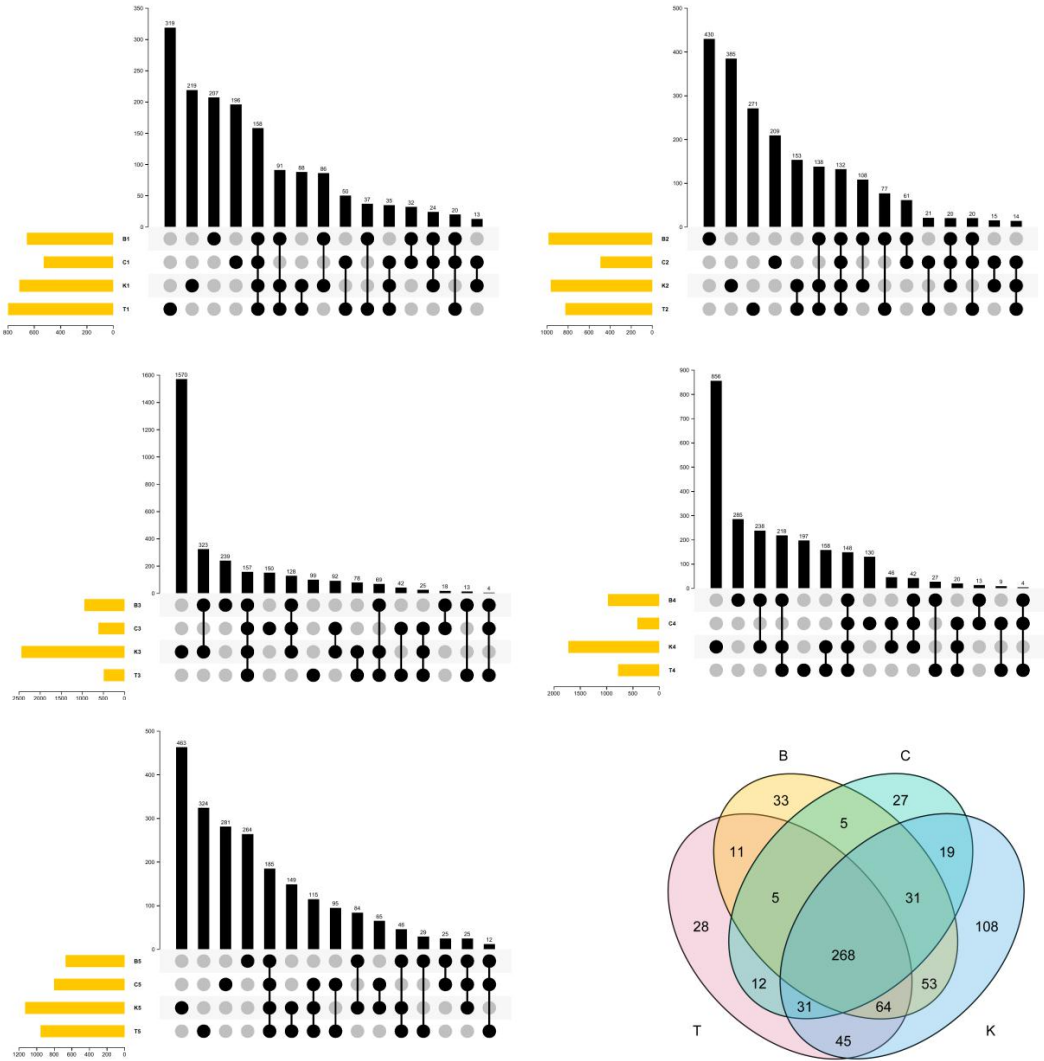

Supplement: Supplementary file [file 26192453]
